# Supplementary material for: Confinement of a Styryl Dye into Nanoporous Aluminophosphates: Channels vs. Cavities
Source: MDPI journal article supplement (doi:10.3390/ijms25073577), 2024-03-22
Supplement: s1 [file s1]

Electronic supporting information for:

Confinement of a styryl dye into nanoporous  
aluminophos-phates: channels vs cavities

by Ainhoa Oliden-Sánchez,<sup>1</sup> Rebeca Sola-Llano,<sup>1</sup> Joaquín Pérez-Pariente,<sup>2</sup>  
Luis Gómez-Hortigüela,<sup>2,\*</sup> and Virginia Martínez-Martínez,<sup>1,\*</sup>

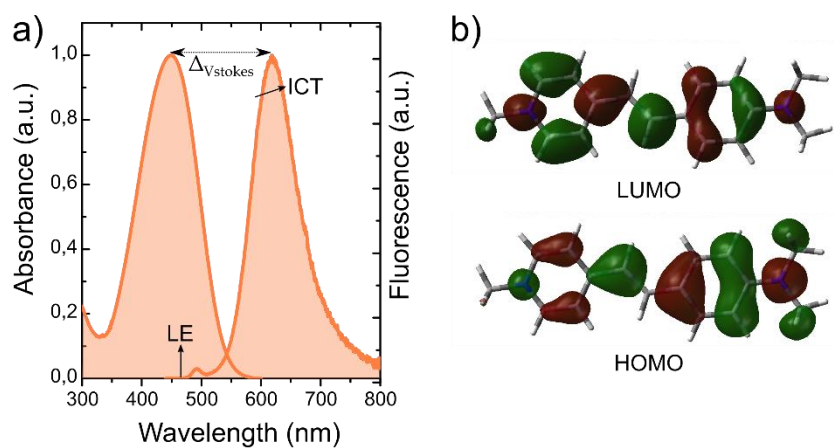

**Figure S1.** a) Height-normalized absorption and emission spectra ( $\lambda_{\text{exc}} = 420 \text{ nm}$ ) recorded for the 4-DASPI dye in aqueous solution; b) HOMO-LUMO orbitals of 4-DASPI dye.

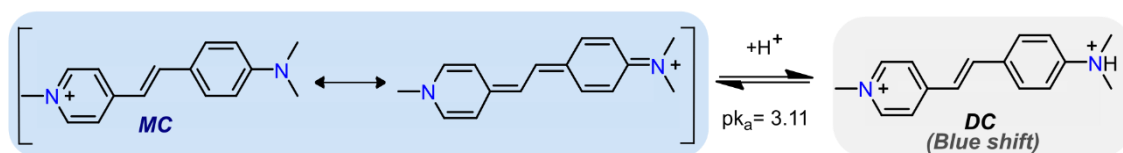

**Figure S2.** Equilibrium between monocation (MC) and dication (DC) species of 4-DASPI dye in aqueous solution.

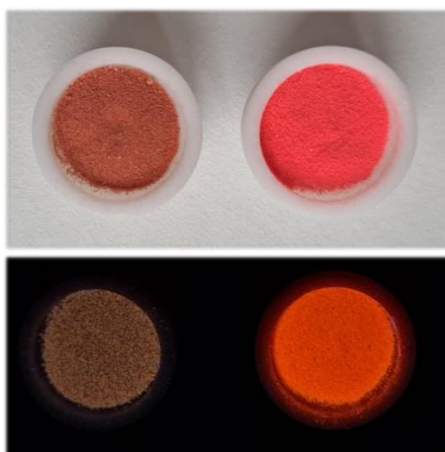

**Figure S3.** Photographs of samples 4-DASPI@MgAPO-AEL (1) and (6) in powder under ambient and UV light.

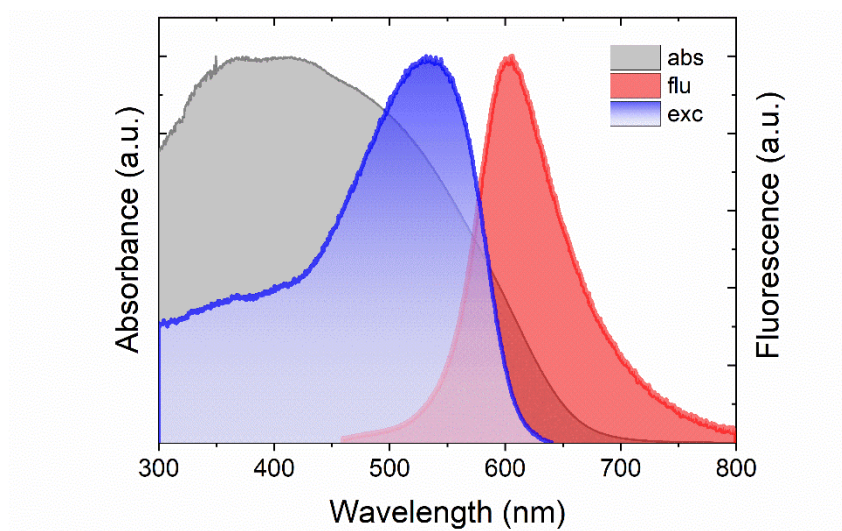

**Figure S4.** Absorption, excitation and emission ( $\lambda_{\text{exc}} = 450 \text{ nm}$ ) spectra of sample 4-DASPI@MgAPO-AEL-1

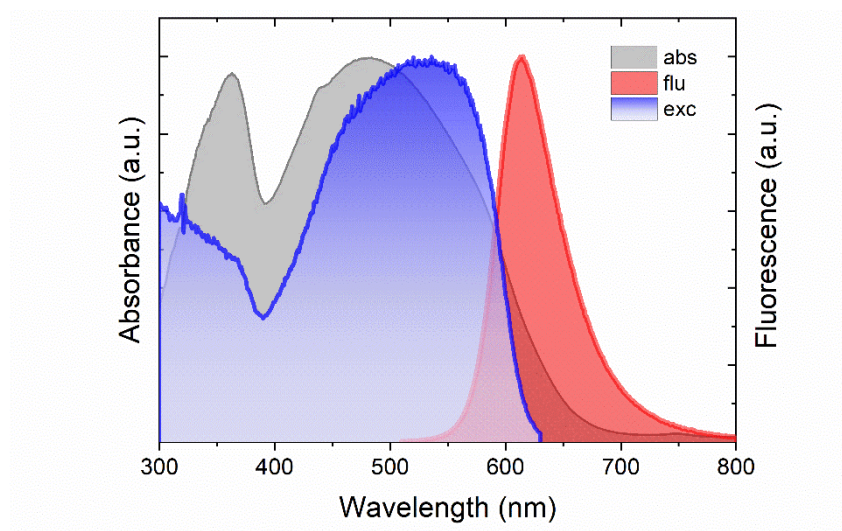

**Figure S5.** Absorption, excitation and emission ( $\lambda_{\text{exc}} = 500 \text{ nm}$ ) spectra of sample 4-DASPI@MgAPO-AEL-6 .
